# Supplementary material for: Global Scientific Trends on Healthy Eating from 2002 to 2021: A Bibliometric and Visualized Analysis
Source: MDPI journal article supplement (doi:10.3390/nu15061461), 2023-03-17
Supplement: s1 [file s1]

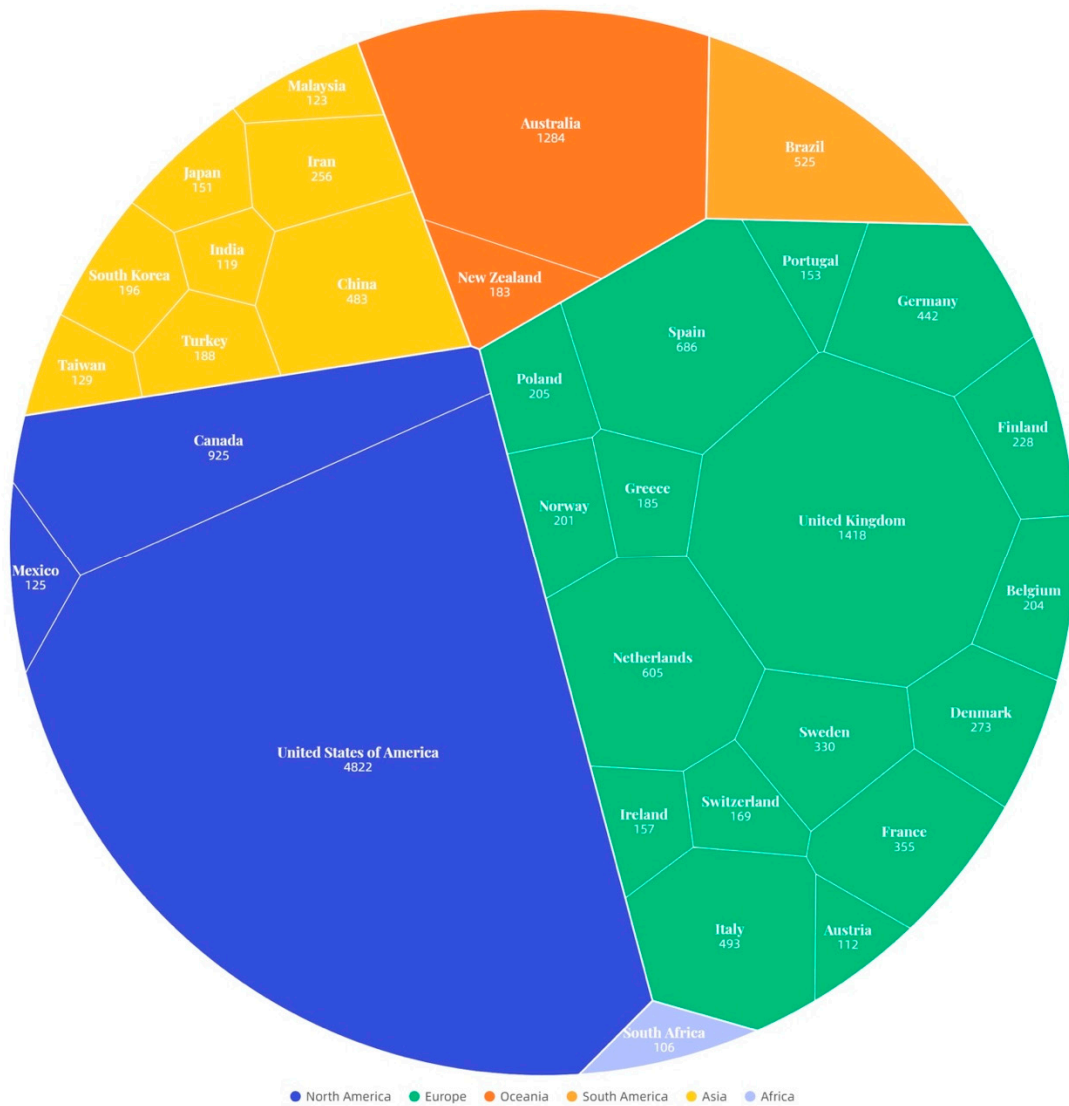

**Figure S1** Distribution and contribution of 32 productive countries/regions globally

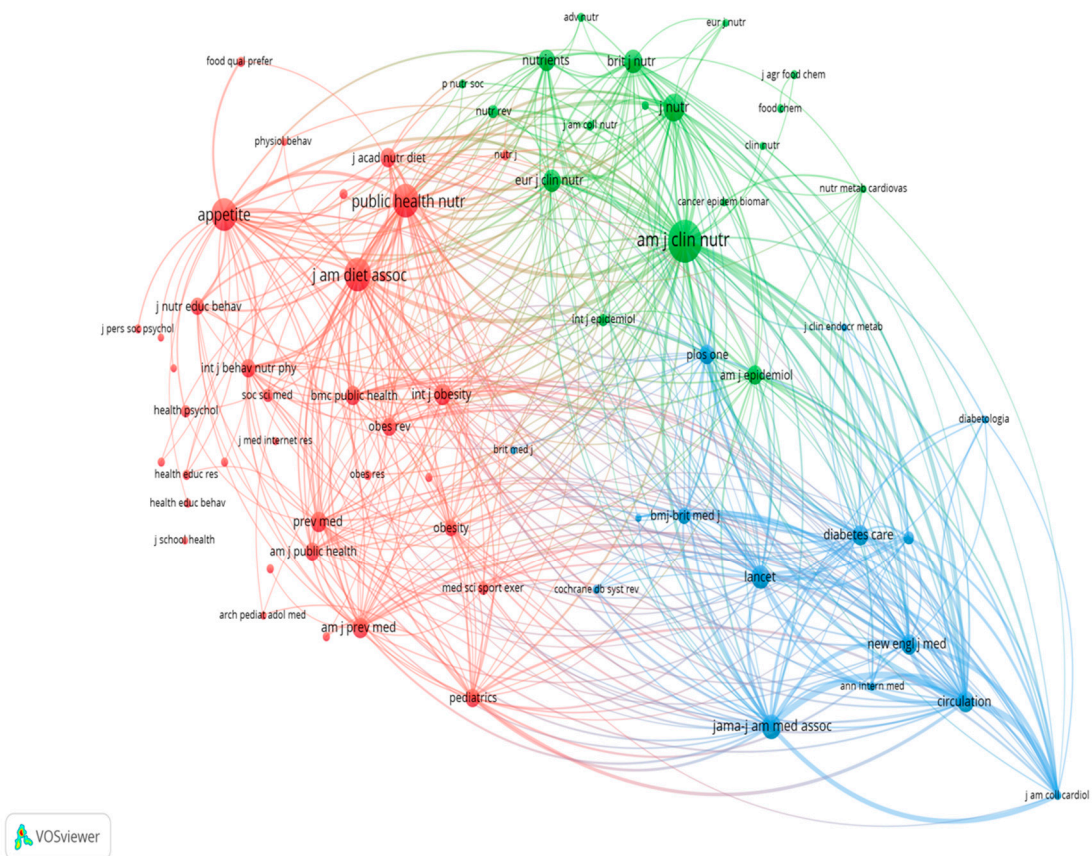

**Figure S2** the co-citation network map of 69 highly cited journals

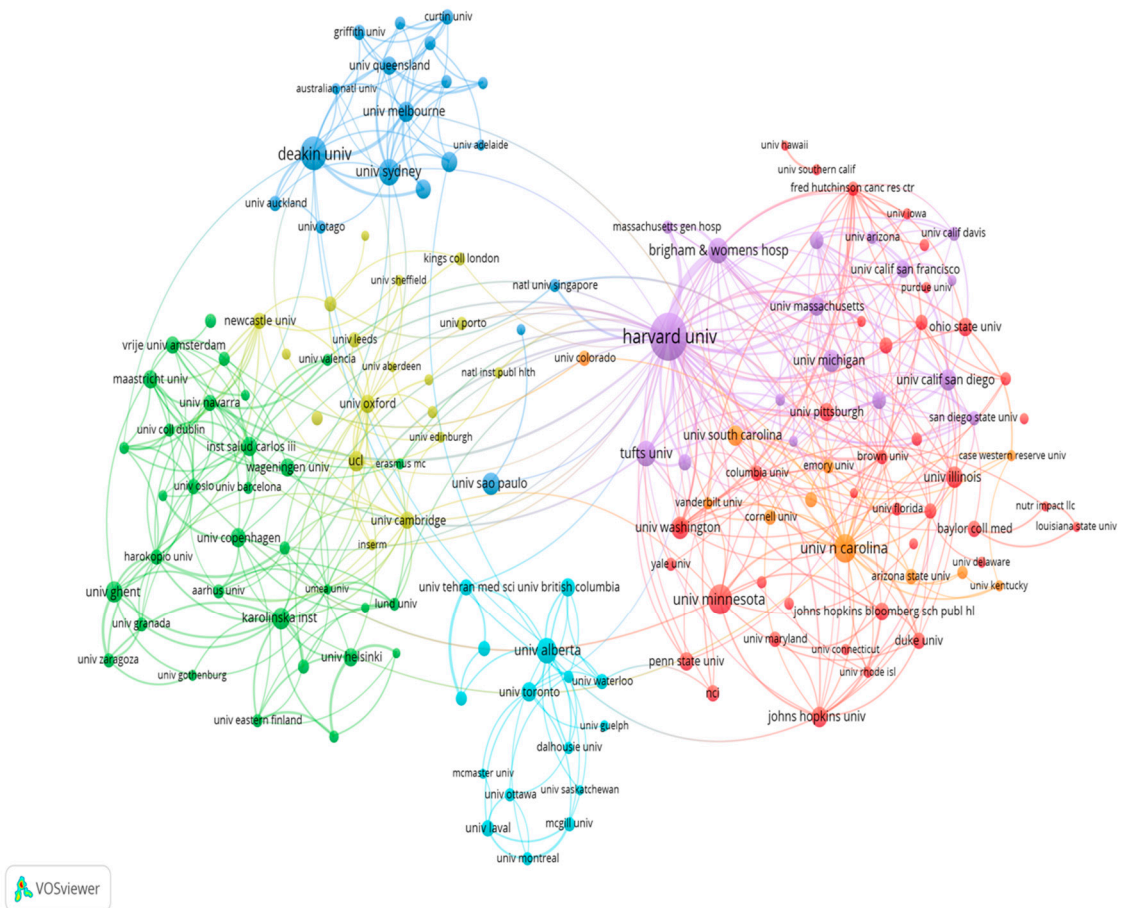

**Figure S3** The cooperative network map of 153 most productive institutions

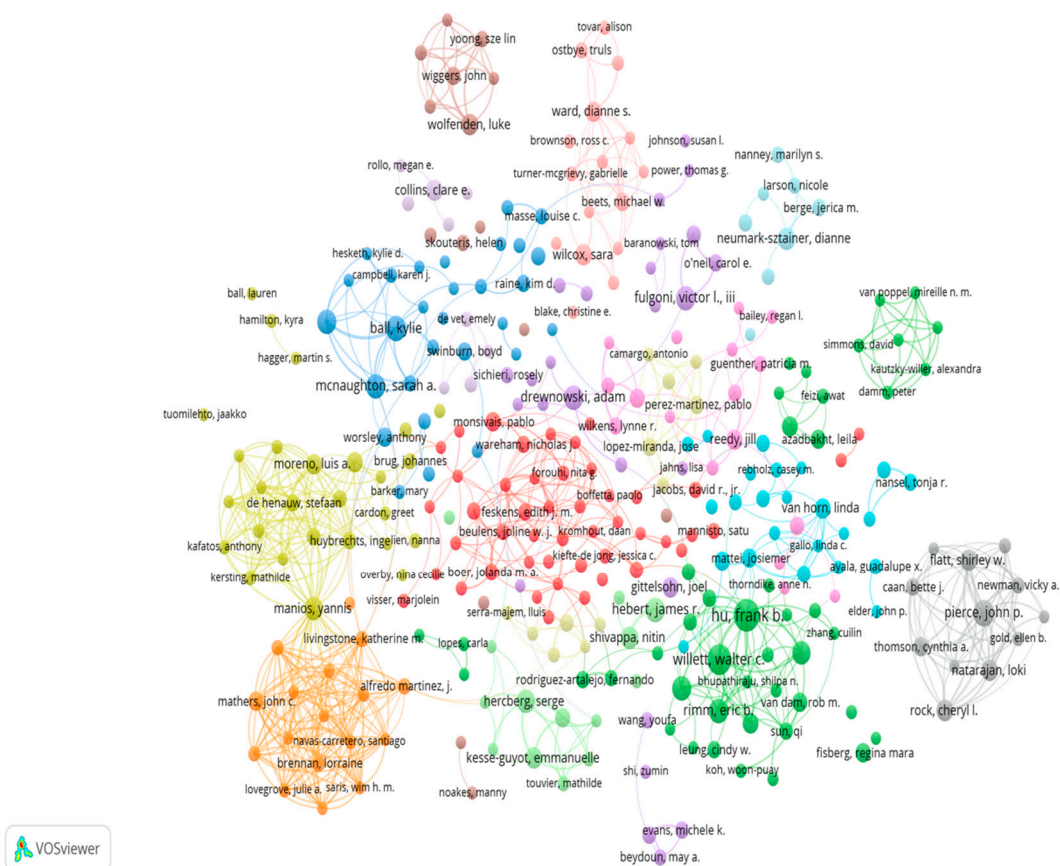

**Figure S4** The co-authorship network map of 324 most productive authors

**Table S1.** Top10 most productive countries/regions in healthy eating research

| <b>Rank</b> | <b>Country</b> | <b>Counts</b> | <b>Citations</b> | <b>Avg. Citations</b> | <b>Avg. Pub. Year</b> |
|-------------|----------------|---------------|------------------|-----------------------|-----------------------|
| 1           | United States  | 4,822         | 129,710          | 27                    | 2015.44               |
| 2           | United Kingdom | 1,418         | 48,000           | 34                    | 2015.12               |
| 3           | Australia      | 1,284         | 33,901           | 26                    | 2015.85               |
| 4           | Canada         | 925           | 24,743           | 27                    | 2015.12               |
| 5           | Spain          | 686           | 18,782           | 27                    | 2016.64               |
| 6           | Netherlands    | 605           | 14,900           | 25                    | 2016.44               |
| 7           | Brazil         | 525           | 8,827            | 17                    | 2017.25               |
| 8           | Italy          | 493           | 15,733           | 32                    | 2016.52               |
| 9           | China          | 483           | 11,270           | 23                    | 2017.82               |
| 10          | Germany        | 442           | 17,593           | 40                    | 2016.26               |

Avg. Citations, average citations; Ave. Pub. Year, average publication year

**Table S2.** Top 10 most productive journals in healthy eating research

| Rank | Journal                                | IF2020 | JCR | Counts | Citations | Avg. Citations | Avg. Pub. Year |
|------|----------------------------------------|--------|-----|--------|-----------|----------------|----------------|
| 1    | Nutrients                              | 5.719  | Q1  | 678    | 5,397     | 8              | 2019.36        |
| 2    | Public Health Nutrition                | 4.022  | Q2  | 475    | 11,148    | 23             | 2015.39        |
| 3    | Appetite                               | 3.868  | Q1  | 399    | 9,304     | 23             | 2016.19        |
| 4    | BMC Public Health                      | 3.295  | Q2  | 362    | 6,804     | 19             | 2015.80        |
| 5    | Int J Environ Res Public Health        | 3.390  | Q1  | 240    | 1,205     | 5              | 2019.50        |
| 6    | American Journal of Clinical Nutrition | 7.047  | Q1  | 203    | 12,121    | 60             | 2014.65        |
| 7    | J Acad Nutr Diet                       | 4.910  | Q2  | 194    | 5,881     | 30             | 2016.75        |
| 8    | PLOS ONE                               | 3.240  | Q2  | 186    | 3,701     | 20             | 2017.01        |
| 9    | British Journal of Nutrition           | 3.718  | Q3  | 182    | 5,006     | 28             | 2014.83        |
| 10   | Journal of Nutrition                   | 4.798  | Q2  | 177    | 8,761     | 49             | 2014.88        |

Avg. Citations, average citations; Ave. Pub. Year, average publication year; Int J Environ Res

Public Health, International Journal of Environmental Research and Public Health; J Acad Nutr

Diet, Journal of The Academy of Nutrition and Dietetics; JCR, Journal Citation Reports; Q,

quartile

**Table S3.** Top 10 most productive institutions in healthy eating research

| <b>Rank</b> | <b>Institution</b>           | <b>Counts</b> | <b>Citations</b> | <b>Avg. Citations</b> | <b>Avg. Pub. Year</b> |
|-------------|------------------------------|---------------|------------------|-----------------------|-----------------------|
| 1           | Harvard University           | 477           | 23,020           | 48                    | 2016.16               |
| 2           | Deakin University            | 271           | 8,217            | 30                    | 2014.99               |
| 3           | University of Minnesota      | 228           | 10,183           | 45                    | 2014.60               |
| 4           | University of North Carolina | 200           | 5,656            | 28                    | 2014.84               |
| 5           | University of Sydney         | 179           | 5,848            | 33                    | 2015.74               |
| 6           | Brigham & Women's Hospital   | 168           | 11,220           | 67                    | 2015.35               |
| 7           | Tufts University             | 167           | 6,747            | 40                    | 2016.20               |
| 8           | University of Alberta        | 164           | 4,347            | 27                    | 2014.65               |
| 9           | University of Sao Paulo      | 138           | 2,122            | 15                    | 2017.16               |
| 10          | Karolinska Institute         | 136           | 5,481            | 40                    | 2016.44               |

Avg. Citations, average citations; Ave. Pub. Year, average publication year

**Table S4.** Top 10 most productive authors in healthy eating research

| <b>Rank</b> | <b>Author</b>        | <b>Gender</b> | <b>Counts</b> | <b>Citations</b> | <b>Avg. Citations</b> | <b>Avg. Pub. Year</b> |
|-------------|----------------------|---------------|---------------|------------------|-----------------------|-----------------------|
| 1           | Hu, Frank B.         | Male          | 75            | 7,526            | 100                   | 2015.05               |
| 2           | Willett, Walter C.   | Male          | 65            | 4,795            | 74                    | 2015.70               |
| 3           | Pierce, John P.      | Male          | 48            | 2,813            | 59                    | 2010.94               |
| 4           | Ball, Kylie          | Female        | 44            | 1,667            | 38                    | 2013.48               |
| 5           | Drewnowski, Adam     | Male          | 40            | 1,184            | 30                    | 2017.23               |
| 6           | Mcnaughton, Sarah A. | Female        | 40            | 1,288            | 32                    | 2016.10               |
| 7           | Crawford, David      | Male          | 39            | 1,742            | 45                    | 2012.55               |
| 8           | Rimm, Eric B.        | Male          | 39            | 3,159            | 81                    | 2017.03               |
| 9           | Fulgoni, Victor L.   | Male          | 38            | 1,360            | 36                    | 2014.87               |
| 10          | Fung, Teresa T.      | Female        | 38            | 2,851            | 75                    | 2015.79               |

Avg. Citations, average citations; Avg. Pub. Year, average publication year
